# Supplementary material for: A Systematic Genotoxicity Assessment of a Suite of Metal Oxide Nanoparticles Reveals Their DNA Damaging and Clastogenic Potential
Source: MDPI journal article supplement (doi:10.3390/nano14090743), 2024-04-24
Supplement: s1 [file s1]

## **Supplementary Information**

# **A systematic genotoxicity assessment of a suite of metal oxide nanoparticles reveals their DNA damaging and clastogenic potential**

Silvia Aidee Solorio-Rodriguez, Dongmei Wu, Andrey Boyadzhiev, Callum Christ, Andrew Williams, Sabina Halappanavar\*

Environmental Health Science and Research Bureau, Health Canada, Ottawa, Ontario, Canada.

\*Corresponding author

Sabina Halappanavar, PhD

Environmental Health Science and Research Bureau, Health Canada, Ottawa, ON, Canada,

K1A 0K9

Email: [sabina.halappanavar@hc-sc.gc.ca](mailto:sabina.halappanavar@hc-sc.gc.ca)

**Table S1. Sonication parameters for MONPs and MOMP stock suspensions in dH<sub>2</sub>O.**

| Stock suspension                                     | Concentration | Volume | Sonication time | Amplitude | DSE (J/mL) |
|------------------------------------------------------|---------------|--------|-----------------|-----------|------------|
|                                                      | (mg/mL)       | (mL)   | (min)           | (%)       |            |
| Uncoated ZnO NPs (US3580) <sup>a</sup>               | 5             | 8      | 2.25            | 40        | 655        |
| Uncoated ZnO NPs (5811HT)                            | 5             | 50     | 14              | 40        | 655        |
| APTES coated ZnO NPs (5812HT)                        | 5             | 50     | 14              | 40        | 655        |
| Stearic acid treated ZnO NPs (8412DL)                | 5             | 50     | 14              | 40        | 655        |
| ZnO MPs (US1003M) <sup>a</sup>                       | 5             | 8      | 2.25            | 40        | 655        |
| Uncoated CuO NPs 544868 <sup>a</sup>                 | 1             | 8      | 1.9             | 10        | 109.5      |
| Uncoated CuO NPs (US3070)                            | 1             | 8      | 1.9             | 10        | 109.5      |
| PVP coated CuO NPs (US3070)                          | 1             | 8      | 1.9             | 10        | 109.5      |
| Silane coated CuO NPs (US3070)                       | 1             | 8      | 3.8             | 10        | 219        |
| CuO MPs (US1140M) <sup>a</sup>                       | 1             | 8      | 1.9             | 10        | 109.5      |
| Uncoated MnO <sub>2</sub> NPs (4910DX)               | 5             | 8      | 1.5             | 40        | 440        |
| MnO <sub>2</sub> MPs (4930DX)                        | 5             | 8      | 1.5             | 40        | 440        |
| Uncoated NiO NPs (US3355)                            | 5             | 8      | 1.5             | 60        | 733        |
| Uncoated NiO NPs (US3352)                            | 5             | 8      | 1.5             | 60        | 733        |
| PVP coated NiO NPs (US3352)                          | 5             | 8      | 1.5             | 60        | 733        |
| Stearic acid coated NiO NPs (US3352)                 | 5             | 8      | 1.5             | 60        | 733        |
| Silane coated NiO NPs (US3352)                       | 5             | 8      | 3               | 60        | 1466       |
| NiO MPs (US1014M)                                    | 5             | 8      | 1.5             | 60        | 733        |
| Uncoated Al <sub>2</sub> O <sub>3</sub> NPs (544833) | 5             | 8      | 3               | 55        | 1270       |
| Al <sub>2</sub> O <sub>3</sub> MPs (1331DL)          | 5             | 8      | 3               | 55        | 1270       |
| Uncoated CeO <sub>2</sub> NPs (US3136)               | 5             | 8      | 4               | 60        | 1953       |
| Uncoated CeO <sub>2</sub> NPs (US3036)               | 5             | 8      | 4               | 60        | 1953       |
| PVP coated CeO <sub>2</sub> NPs (US3037)             | 1             | 100    | 12              | 60        | 469        |
| Stearic acid coated CeO <sub>2</sub> NPs (US3037)    | 1             | 100    | 12              | 60        | 469        |
| CeO <sub>2</sub> MPs (2118CG)                        | 5             | 8      | 4               | 60        | 1953       |
| Uncoated TiO <sub>2</sub> NPs <sup>b</sup>           | 5             | 50     | 15              | 55        | 1013       |
| TiO <sub>2</sub> MPs (US1017M) <sup>b</sup>          | 5             | 50     | 15              | 55        | 1013       |
| Uncoated Fe <sub>2</sub> O <sub>3</sub> NPs (US3160) | 1             | 100    | 10              | 55        | 338        |
| Fe <sub>2</sub> O <sub>3</sub> MPs (US1139M)         | 1             | 100    | 10              | 55        | 338        |

<sup>a</sup>Sonicator parameters published in [34]. <sup>b</sup>Previously published in [54]. Conditions were optimized from Avramescu et al. [38, 39]. The sonicator was operated for 8 seconds on with 2 seconds off. DSE: Delivered sonication energy.  $DSE = (P \times T)/V$ . P=power (W), T=time (seconds), V=volume (mL).

**Table S2. HD, PDI and ZP in dH<sub>2</sub>O determined by DLS and ELS.**

| MONPs                                                | H <sub>2</sub> O |             |              |
|------------------------------------------------------|------------------|-------------|--------------|
|                                                      | HD               | PDI         | ZP           |
|                                                      | (nm)             |             | (mV)         |
| Uncoated ZnO NPs (US3580)                            | 271 ± 25.7       | 0.32 ± 0.05 | 21.1 ± 0.76  |
| Uncoated ZnO NPs (5811HT)                            | 255 ± 43.7       | 0.23 ± 0.04 | 21.52 ± 1.69 |
| APTES coated ZnO NPs (5812HT)                        | 408 ± 57.7       | 0.36 ± 0.05 | 14.4 ± 0.49  |
| Stearic acid treated ZnO NPs (8412DL)                | 272 ± 43.5       | 0.31 ± 0.06 | 19.41 ± 0.49 |
| Uncoated CuO NPs (544868)                            | 647 ± 43.7       | 0.46 ± 0.06 | −9.85 ± 0.54 |
| Uncoated CuO NPs (US3070)                            | 343 ± 21.4       | 0.39 ± 0.04 | −9.85 ± 0.54 |
| PVP coated CuO NPs (US3070)                          | 309 ± 31.18      | 0.33 ± 0.05 | 11.9 ± 0.58  |
| Silane coated CuO NPs (US3070)                       | 552 ± 62.1       | 0.45 ± 0.06 | 36.9 ± 0.91  |
| Uncoated MnO <sub>2</sub> NPs (4910DX)               | 134 ± 1.53       | 0.20 ± 0.03 | −15.3 ± 1.71 |
| Uncoated NiO NPs (US3355)                            | 204 ± 10.1       | 0.31 ± 0.06 | 32.7 ± 3.70  |
| Uncoated NiO NPs (US3352)                            | 174 ± 2.38       | 0.21 ± 0.02 | 47.2 ± 0.67  |
| PVP coated NiO NPs (US3352)                          | 179 ± 1.44       | 0.16 ± 0.02 | 41.0 ± 0.69  |
| Stearic acid coated NiO NPs (US3352)                 | 260 ± 5.23       | 0.28 ± 0.03 | 38.0 ± 0.75  |
| Silane coated NiO NPs (US3352)                       | 199 ± 6.66       | 0.26 ± 0.04 | 48.1 ± 0.98  |
| Uncoated Al <sub>2</sub> O <sub>3</sub> NPs (544833) | 350 ± 43.3       | 0.37 ± 0.06 | 29.5 ± 2.70  |
| Uncoated CeO <sub>2</sub> NPs (US3136)               | 185 ± 7.85       | 0.29 ± 0.04 | 34.0 ± 1.05  |
| Uncoated CeO <sub>2</sub> NPs (US3036)               | 189 ± 10.4       | 0.33 ± 0.05 | −42.7 ± 3.63 |
| PVP coated CeO <sub>2</sub> NPs (US3037)             | 410 ± 14.7       | 0.35 ± 0.05 | 33.0 ± 0.84  |
| Stearic acid coated CeO <sub>2</sub> NPs (US3037)    | 399 ± 19.6       | 0.42 ± 0.06 | −5.39 ± 1.16 |
| Uncoated TiO <sub>2</sub> NPs                        | 150.33 ± 2.08    | 0.14 ± 0.01 | 27.93 ± 0.96 |
| Uncoated Fe <sub>2</sub> O <sub>3</sub> NPs (US3160) | 187 ± 15.5       | 0.33 ± 0.04 | −38.6 ± 1.60 |

**Table S3. % Solubility in DMEM cell culture media, and SSA of all MO particles.**

NPs: nanoparticles. MP: microparticles. % Solubility data from Avramescu et al. [38, 41].

| Particle (Catalogue Number)                                  | % Solubility<br>10 µg/mL | % Solubility<br>100 µg/mL | SSA (m <sup>2</sup> /g) |
|--------------------------------------------------------------|--------------------------|---------------------------|-------------------------|
| Uncoated ZnO NPs (US3580)                                    | 94.5                     | 19.3                      | 27.268                  |
| Uncoated ZnO NPs (5811HT)                                    |                          |                           | 21.715                  |
| APTES coated ZnO NPs (5812HT)                                |                          |                           | 16.52                   |
| Stearic acid coated ZnO NPs (8412DL)                         |                          |                           | 28.279                  |
| Uncoated ZnO MPs (US1003M)                                   |                          | 11.8                      | 5.85                    |
| Uncoated CuO NPs (544868)                                    | 12.6                     | 51.6                      | 10.343                  |
| Uncoated CuO NPs (US3070)                                    |                          |                           | 7.2                     |
| PVP coated CuO NPs (US3070)                                  |                          |                           | 8.779                   |
| Silane coated CuO NPs (US3070)                               |                          |                           | 6.11                    |
| Uncoated CuO MPs (US1140M)                                   |                          | 1.17                      | 0.797                   |
| Uncoated MnO <sub>2</sub> NPs (SS4910DX)                     | 4.79                     | 3.87                      | 42.164                  |
| Uncoated MnO <sub>2</sub> MPs (SS4930DX)                     |                          | 1.366                     | 2.547                   |
| Uncoated NiO NPs (US3355)                                    | 0.94                     | 1.81                      | 36.602                  |
| Uncoated NiO NPs (US3352)                                    |                          |                           | 30.155                  |
| PVP coated NiO NPs (US3352)                                  |                          |                           | 36.675                  |
| Stearic acid coated NiO NPs (US3352)                         |                          |                           | 14.629                  |
| Silane coated NiO NPs (US3352)                               |                          |                           | 16.537                  |
| Uncoated NiO MPs (US1014M)                                   |                          | 0.067                     | 2.518                   |
| Uncoated Al <sub>2</sub> O <sub>3</sub> NPs (544833)         | 1.11                     | 0.73                      | 145.292                 |
| Uncoated Al <sub>2</sub> O <sub>3</sub> MPs (1331DL)         |                          | 0.021                     | 22.32                   |
| Uncoated CeO <sub>2</sub> NPs (US3136)                       |                          |                           | 26.475                  |
| Uncoated CeO <sub>2</sub> NPs (US3036)                       | 1.12                     | 0.42                      | 14.057                  |
| PVP coated CeO <sub>2</sub> NPs (US3037)                     |                          |                           | 67.114                  |
| Stearic acid coated CeO <sub>2</sub> NPs (US3037)            |                          |                           | 32.854                  |
| Uncoated CeO <sub>2</sub> MPs (2118CG)                       |                          |                           | 4.48                    |
| Uncoated TiO <sub>2</sub> NPs (NIST)                         | 0.17                     | 0.045                     | 52.734                  |
| Uncoated TiO <sub>2</sub> MPs (US1017M)                      |                          | 0.0005                    | 10.759                  |
| Uncoated Fe <sub>2</sub> O <sub>3</sub> NPs (US3160)         |                          | 0.0205                    | 44.876                  |
| Uncoated Fe <sub>2</sub> O <sub>3</sub> MPs (US1139M)        |                          |                           | 9.521                   |
| NPs included in BMC analysis                                 |                          |                           |                         |
| Particle (Catalogue Number)                                  |                          |                           | SSA (m <sup>2</sup> /g) |
| Silica coated TiO <sub>2</sub> NPs (5422HT)                  |                          |                           | 39.218                  |
| Silica and alumina coated TiO <sub>2</sub> NPs (5423HT)      |                          |                           | 28.607                  |
| Silica and stearic acid coated TiO <sub>2</sub> NPs (5424HT) |                          |                           | 39.534                  |
| Silica and silicone oil coated TiO <sub>2</sub> NPs (5425HT) |                          |                           | 17.541                  |
| Uncoated TiO <sub>2</sub> NPs (MKNA005)                      |                          |                           | 150.100                 |
| Uncoated TiO <sub>2</sub> NPs (MKNA050)                      |                          |                           | 62.937                  |
| Uncoated TiO <sub>2</sub> NPs (MKNR050P)                     |                          |                           | 23.798                  |

**Table S4. Endpoint ranking based on  $\mu\text{g}$  metal/mL concentration normalized NOEC values.** Where NOEC values were not present, LOEC values were used. Red: uncoated NPs. Green: coated NPs. Black: uncoated MPs. Blue: dissolved metal equivalent.

| Metal | Comet 4 h<br>(NOEC / LOEC Ranking)                                                                                                                                                                                                         | Micronucleus 40 h<br>(NOEC / LOEC Ranking)                                                                                   |
|-------|--------------------------------------------------------------------------------------------------------------------------------------------------------------------------------------------------------------------------------------------|------------------------------------------------------------------------------------------------------------------------------|
| Zn    | ZnO US3580 ~ ZnO 5811HT ~ ZnO 5812HT ~ ZnO 8412DL > ZnO US1003M ~ ZnCl <sub>2</sub>                                                                                                                                                        | ZnO US3580 ~ ZnO 8412DL > ZnO 5812HT > ZnO US1003M > ZnCl <sub>2</sub>                                                       |
| Cu    | CuO 544868 ~ CuO US3070 ~ CuO US3070P ~ CuO US3070Si > CuO US1140M ~ CuCl <sub>2</sub>                                                                                                                                                     | CuO 544868 > CuO US3070Si ~ CuO US1140M > CuO US3070P > CuCl <sub>2</sub>                                                    |
| Mn    | MnSO <sub>4</sub> > MnO <sub>2</sub> 4910DX > MnO <sub>2</sub> 4930DX <sup>(a)</sup>                                                                                                                                                       | MnO <sub>2</sub> 4910DX > MnSO <sub>4</sub> > MnO <sub>2</sub> 4930DX <sup>(a)</sup>                                         |
| Ni    | NiO US3352St > NiO US3355 ~ NiO US3352 ~ NiO US1014M ~ NiO US3352Si > NiO US3352P > NiCl <sub>2</sub>                                                                                                                                      | NiO US3355 > NiO US1014M > NiO US3352St > NiCl <sub>2</sub> > NiO US3352P                                                    |
| Al    | Al <sub>2</sub> O <sub>3</sub> 544833 ~ Al <sub>2</sub> O <sub>3</sub> 1331DL ~ AlCl <sub>3</sub>                                                                                                                                          | AlCl <sub>3</sub> > Al <sub>2</sub> O <sub>3</sub> 544833 > Al <sub>2</sub> O <sub>3</sub> 1331DL                            |
| Ce    | CeO <sub>2</sub> US3136 ~ CeO <sub>2</sub> US3036 ~ CeO <sub>2</sub> US3037P ~ CeO <sub>2</sub> 2118CG ~ CeCl <sub>3</sub> > CeO <sub>2</sub> US3037St                                                                                     | CeCl <sub>3</sub> > CeO <sub>2</sub> US3037St > CeO <sub>2</sub> US3036 ~ CeO <sub>2</sub> US3037P ~ CeO <sub>2</sub> 2118CG |
| Ti    | TiO <sub>2</sub> 5423HT ~ TiO <sub>2</sub> MKNR050P > TiO <sub>2</sub> NIST ~ TiO <sub>2</sub> 5422HT ~ TiO <sub>2</sub> 5424HT ~ TiO <sub>2</sub> 5425HT ~ TiO <sub>2</sub> MKNA005 ~ TiO <sub>2</sub> MKNA050 ~ TiO <sub>2</sub> US1017M | TiO <sub>2</sub> NIST ~ TiO <sub>2</sub> US1017M <sup>(b)</sup>                                                              |
| Fe    | Fe <sub>2</sub> O <sub>3</sub> US3160 ~ Fe <sub>2</sub> O <sub>3</sub> US1139M                                                                                                                                                             | Fe <sub>2</sub> O <sub>3</sub> US3160 > Fe <sub>2</sub> O <sub>3</sub> US1139M <sup>(b)</sup>                                |

<sup>(a)</sup>: Ranking is biased due to low concentration range for MnSO<sub>4</sub>.

<sup>(b)</sup>: Interference seen.

TiO<sub>2</sub> NIST NPs is also referred as “uncoated TiO<sub>2</sub> NPs” in the main text.

**Table S5. Endpoint ranking based on cm<sup>2</sup> particle / cm<sup>2</sup> well-plate concentration normalized NOEC values.** Where NOEC values were not present, LOEC values were used. Red: uncoated NPs. Green: coated NPs. Black: uncoated MPs.

| Metal | Comet 4 h<br>(NOEC / LOEC Ranking)                                                                                                                                                                                                         | Micronucleus 40 h<br>(NOEC / LOEC Ranking)                                                               |
|-------|--------------------------------------------------------------------------------------------------------------------------------------------------------------------------------------------------------------------------------------------|----------------------------------------------------------------------------------------------------------|
| Zn    | ZnO US1003M > ZnO 5812HT > ZnO 5811HT > ZnO US3580 > ZnO 8412DL                                                                                                                                                                            | ZnO US1003M > ZnO US3580 > ZnO 8412DL ~ > ZnO 5812HT                                                     |
| Cu    | CuO US3070Si > CuO US3070 > CuO US1140M > CuO US3070P > CuO 544868                                                                                                                                                                         | CuO US1140M > CuO 544868 > CuO US3070Si > CuO US3070P                                                    |
| Mn    | MnO <sub>2</sub> 4930DX > MnO <sub>2</sub> 4910DX                                                                                                                                                                                          | MnO <sub>2</sub> 4910DX ~ MnO <sub>2</sub> 4930DX                                                        |
| Ni    | NiO US1014M > NiO US3352St > NiO US3352Si > NiO US3352 > NiO US3352 > NiO US3352P                                                                                                                                                          | NiO US1014M > NiO US3355 > NiO US3352St > NiO US3352P                                                    |
| Al    | Al <sub>2</sub> O <sub>3</sub> 1331DL > Al <sub>2</sub> O <sub>3</sub> 544833                                                                                                                                                              | Al <sub>2</sub> O <sub>3</sub> 1331DL > Al <sub>2</sub> O <sub>3</sub> 544833                            |
| Ce    | CeO <sub>2</sub> 2118CG > CeO <sub>2</sub> US3036 > CeO <sub>2</sub> US3136 > CeO <sub>2</sub> US3037St > CeO <sub>2</sub> US3037P                                                                                                         | CeO <sub>2</sub> 2118CG > CeO <sub>2</sub> US3036 > CeO <sub>2</sub> US3036St > CeO <sub>2</sub> US3036P |
| Ti    | TiO <sub>2</sub> US1017M > TiO <sub>2</sub> MKNR050P > TiO <sub>2</sub> 5423HT > TiO <sub>2</sub> 5425HT > TiO <sub>2</sub> 5422HT > TiO <sub>2</sub> 5424HT > TiO <sub>2</sub> NIST > TiO <sub>2</sub> MKNA050 > TiO <sub>2</sub> MKNA005 | TiO <sub>2</sub> US1017M > TiO <sub>2</sub> NIST <sup>(a)</sup>                                          |
| Fe    | Fe <sub>2</sub> O <sub>3</sub> US1139M > Fe <sub>2</sub> O <sub>3</sub> US3160                                                                                                                                                             | Fe <sub>2</sub> O <sub>3</sub> US1139M > Fe <sub>2</sub> O <sub>3</sub> US3160 <sup>(a)</sup>            |

<sup>(a)</sup>: Interference seen.

TiO<sub>2</sub> NIST NPs is also referred as “uncoated TiO<sub>2</sub> NPs” in the main text.

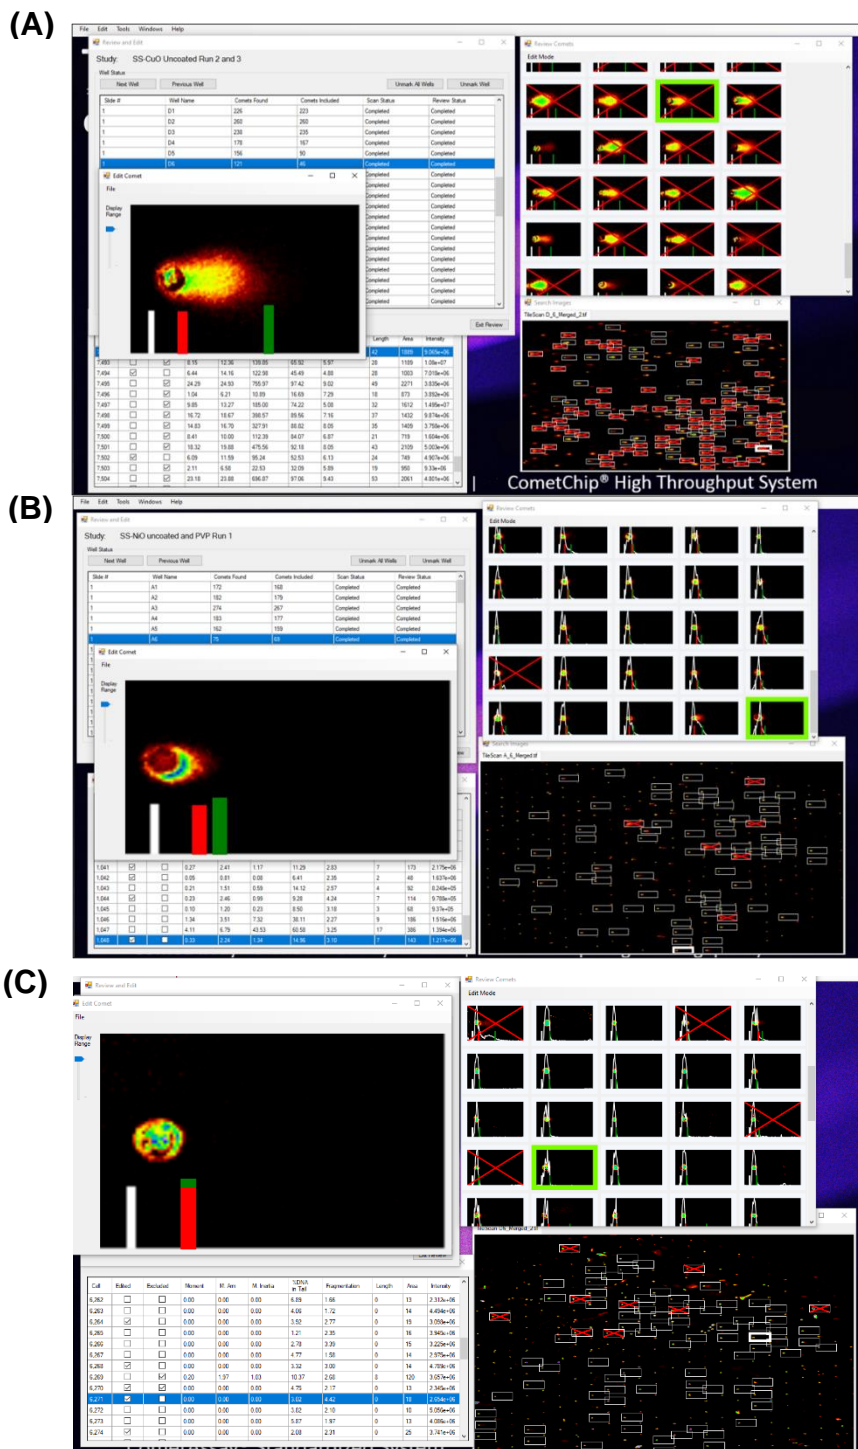

**Figure S1. Representative images of the interference of some MONPs with the SYBR® Gold staining and the analysis of the comet assay at high concentrations. (A) Uncoated CuO NPs (US3070). (B) Uncoated NiO NPs (US3352). (C) Uncoated Fe<sub>2</sub>O<sub>3</sub> NPs (US3160). Analysis was conducted using the Trevigen Comet Software.**

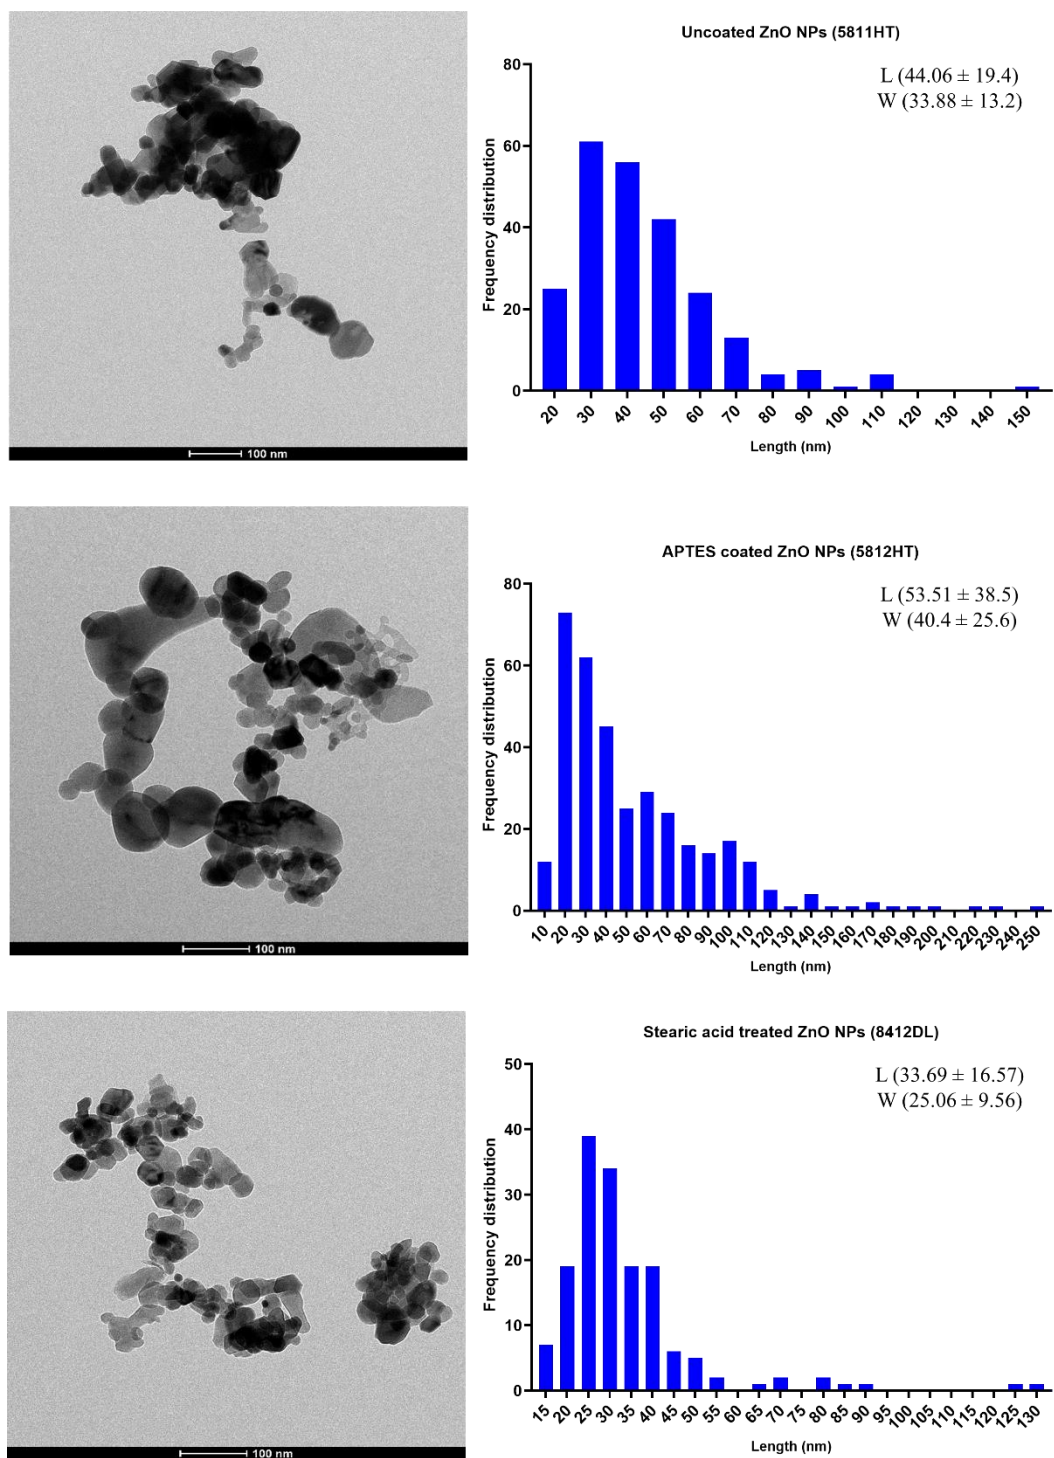

**Figure S2. Representative TEM images and frequency size distribution of ZnO NPs variants. L: Length, W: Width. Scale bar: 100 nm.**



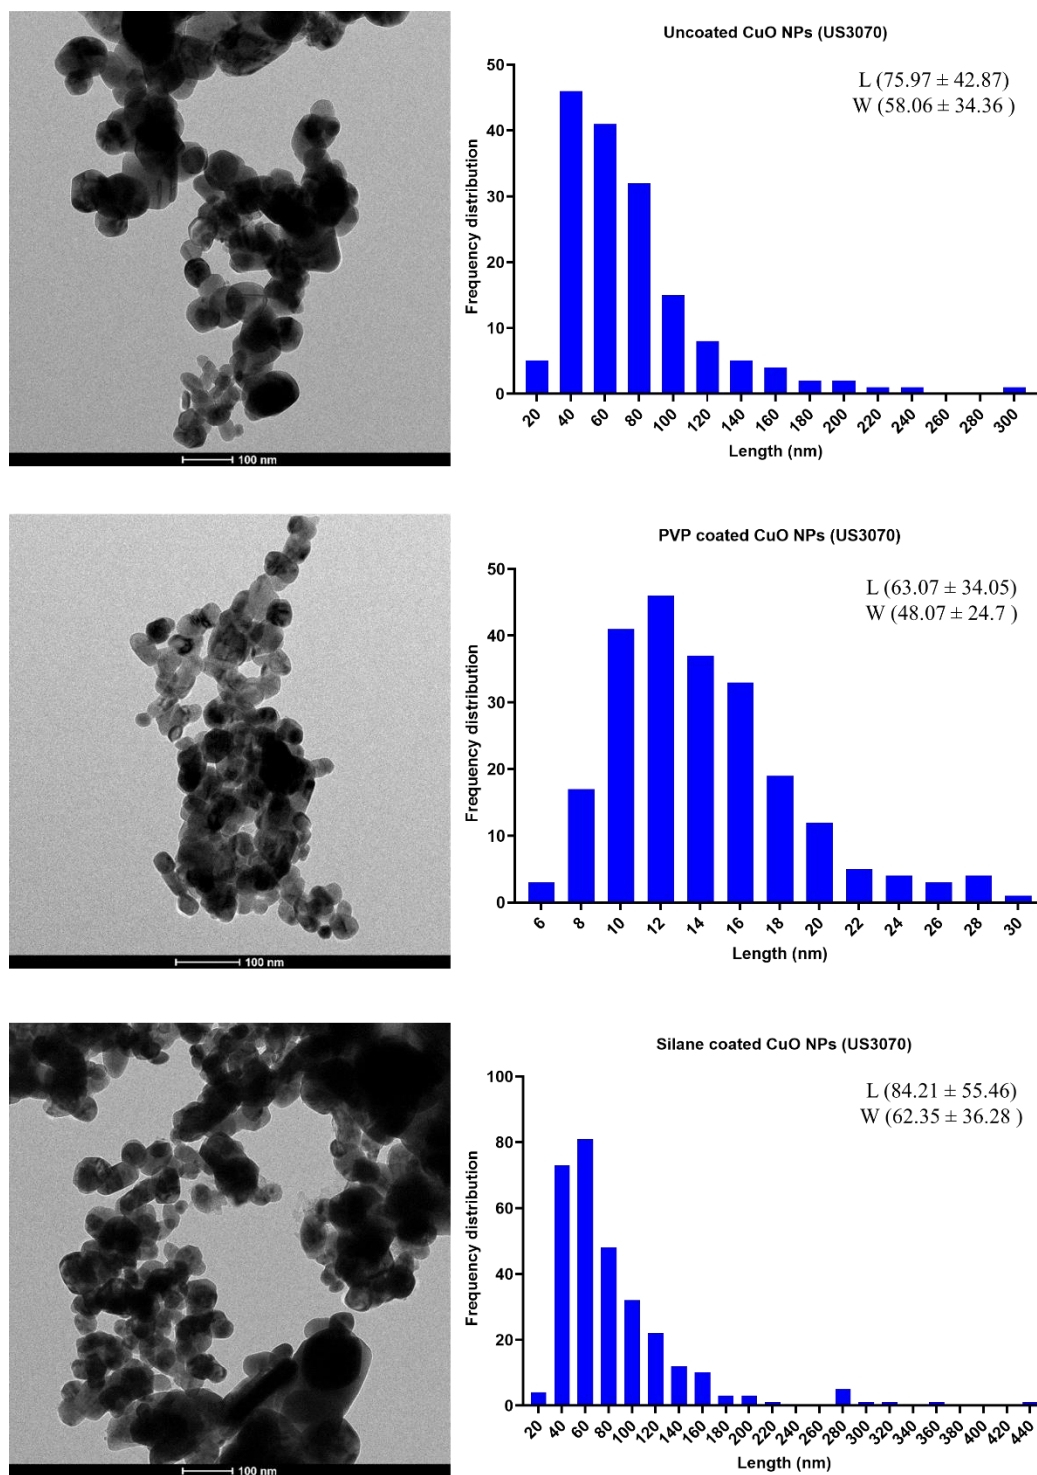

**Figure S3. Representative TEM images and frequency size distribution of CuO NPs variants.** L: Length, W: Width. Scale bar: 100 nm.

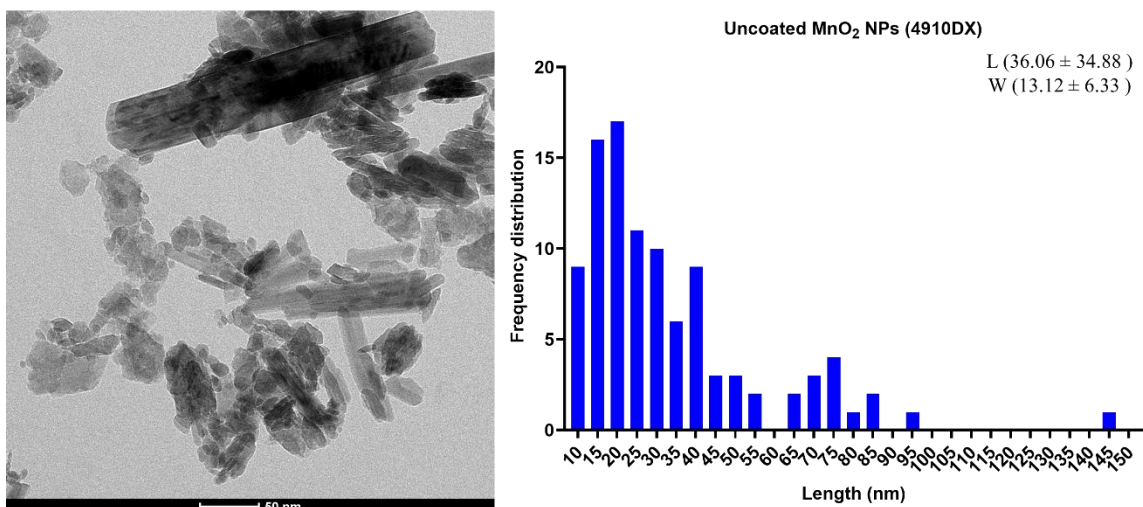

**Figure S4. Representative TEM image and frequency size distribution of MnO<sub>2</sub> NPs.**  
L: Length, W: Width. Scale bar: 50 nm.

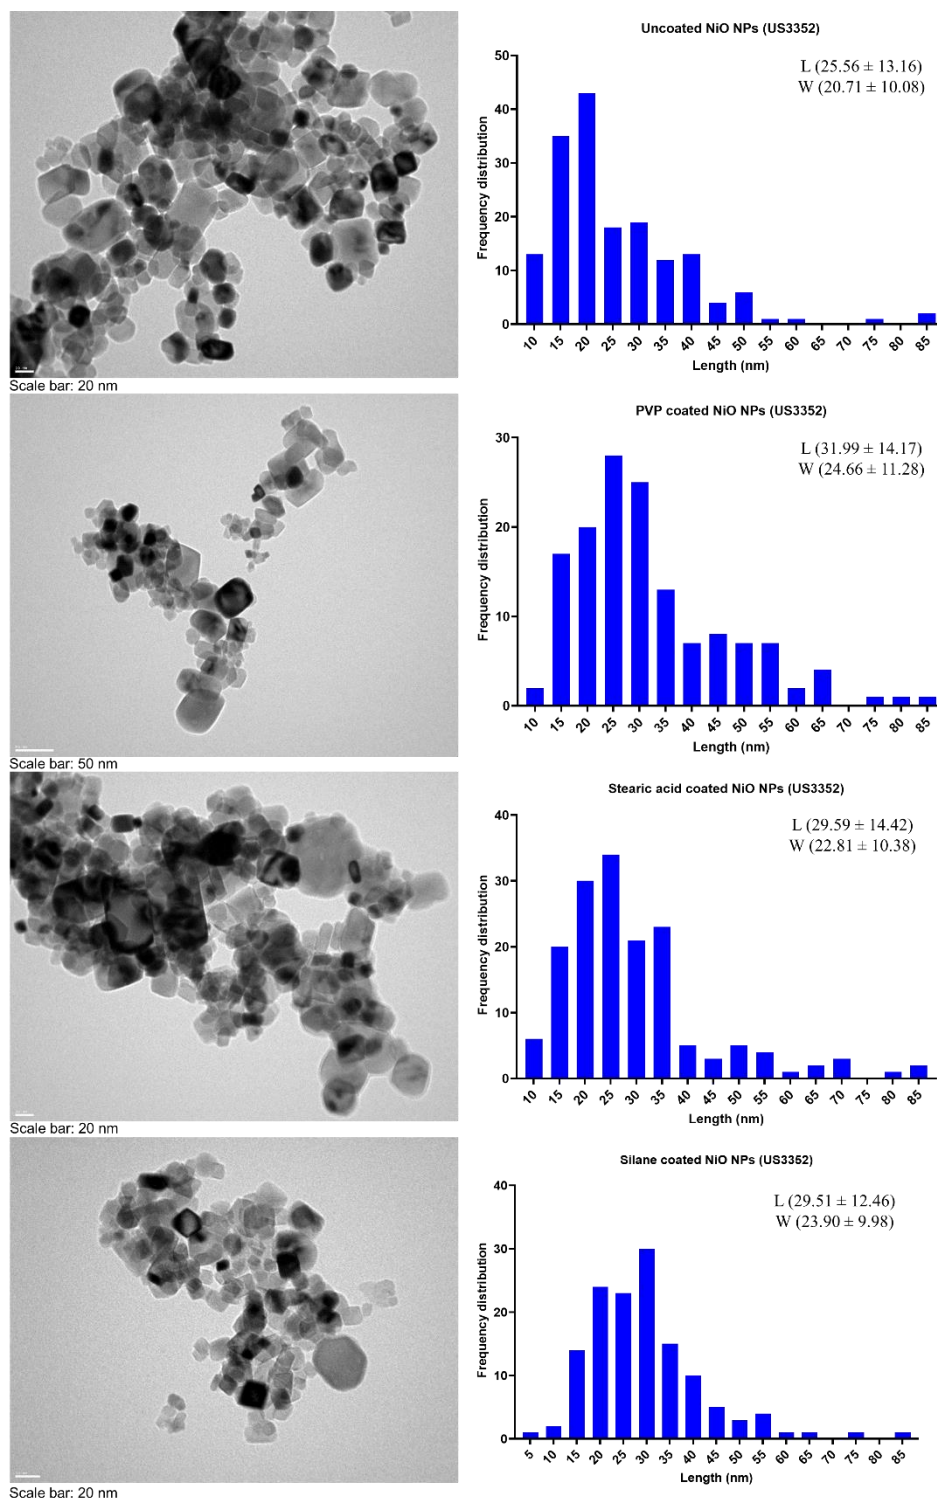

**Figure S5. Representative TEM images and frequency size distribution of NiO NPs variants. L: Length, W: Width.**

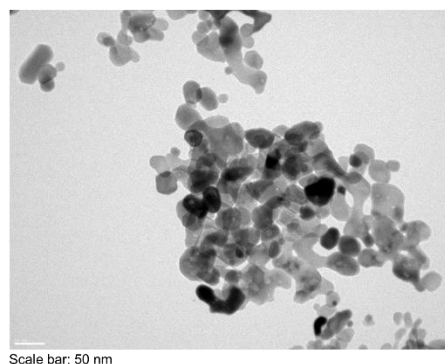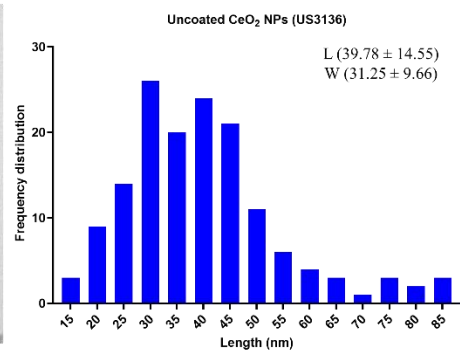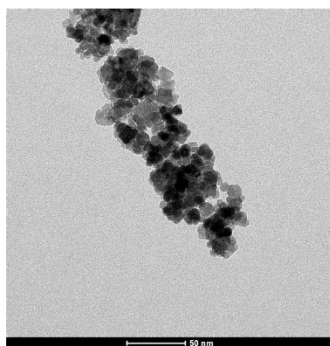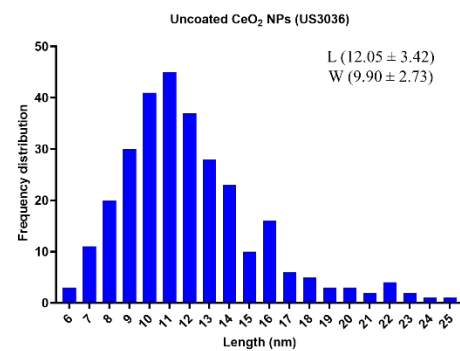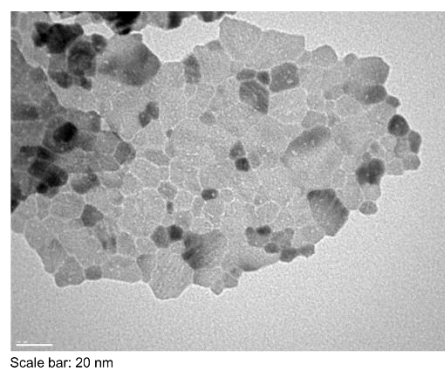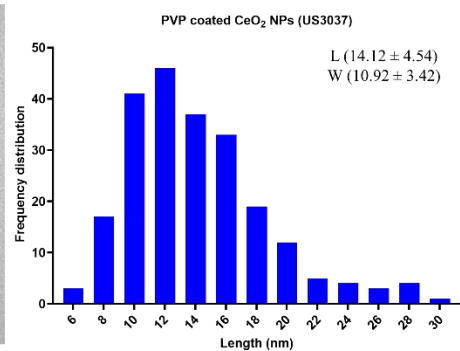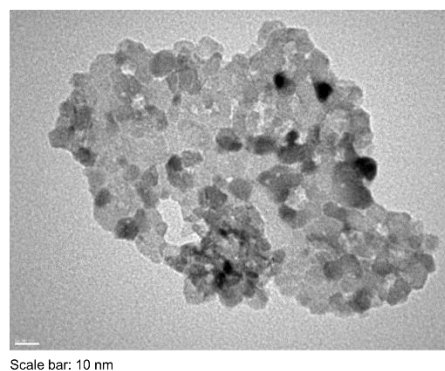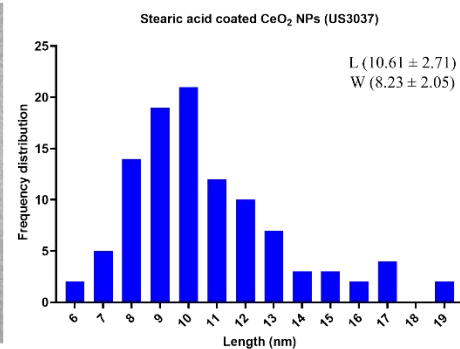

**Figure S6. Representative TEM images and frequency size distribution of CeO<sub>2</sub> NPs variants. L: Length, W: Width.**

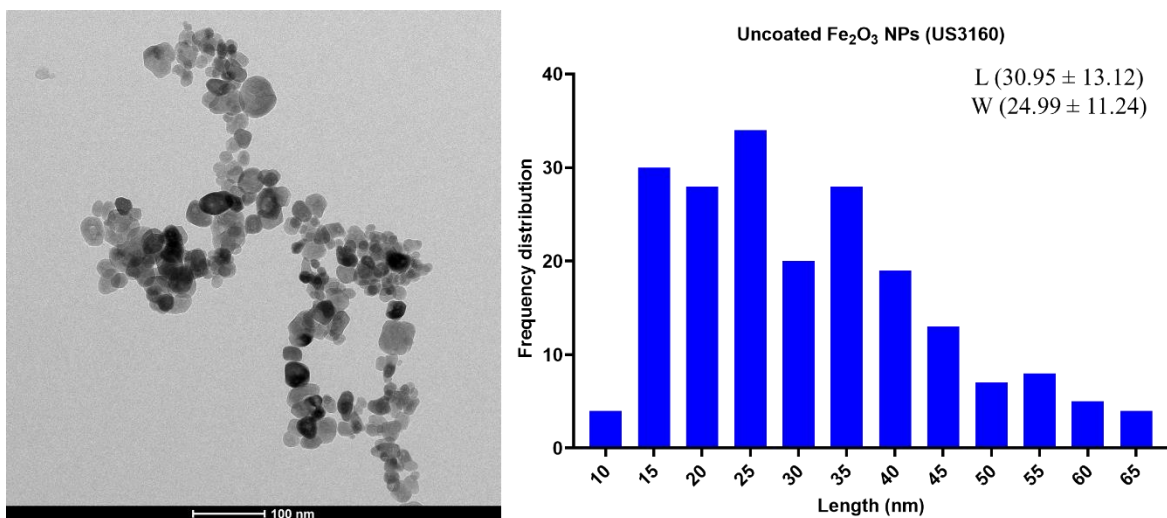

**Figure S7. Representative TEM images and frequency size distribution of Fe<sub>2</sub>O<sub>3</sub> NPs.**  
L: Length, W: Width. Scale bar: 100 nm.

**MnO<sub>2</sub> 4930DX MOMP**

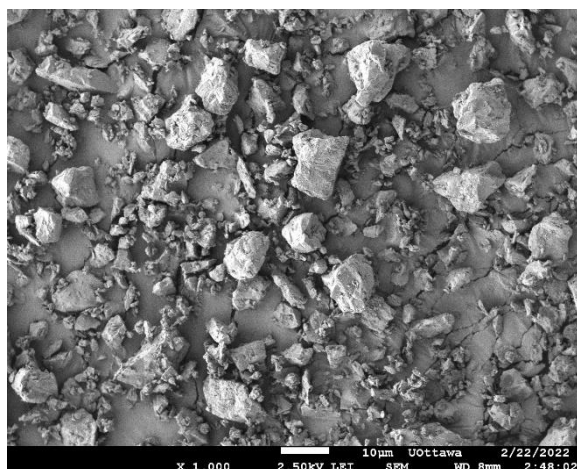

**CeO<sub>2</sub> 2118CG MOMP**

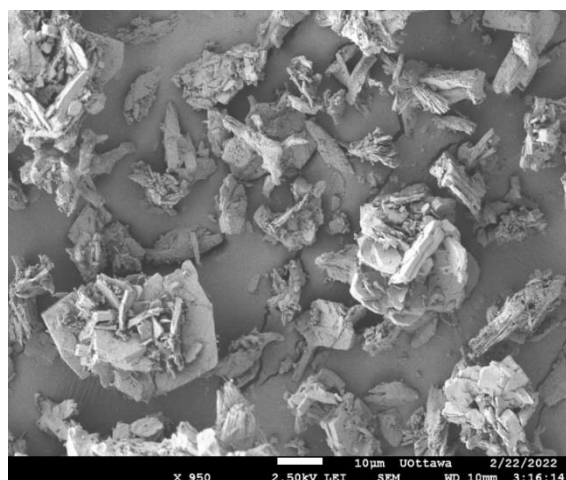

**Fe<sub>2</sub>O<sub>3</sub> US1139M MOMP**

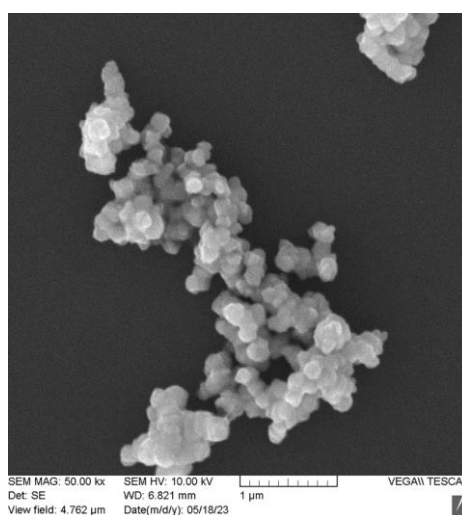

**Figure S8. Representative SEM images of MnO<sub>2</sub> MPs, CeO<sub>2</sub> MPs and Fe<sub>2</sub>O<sub>3</sub> MPs.**



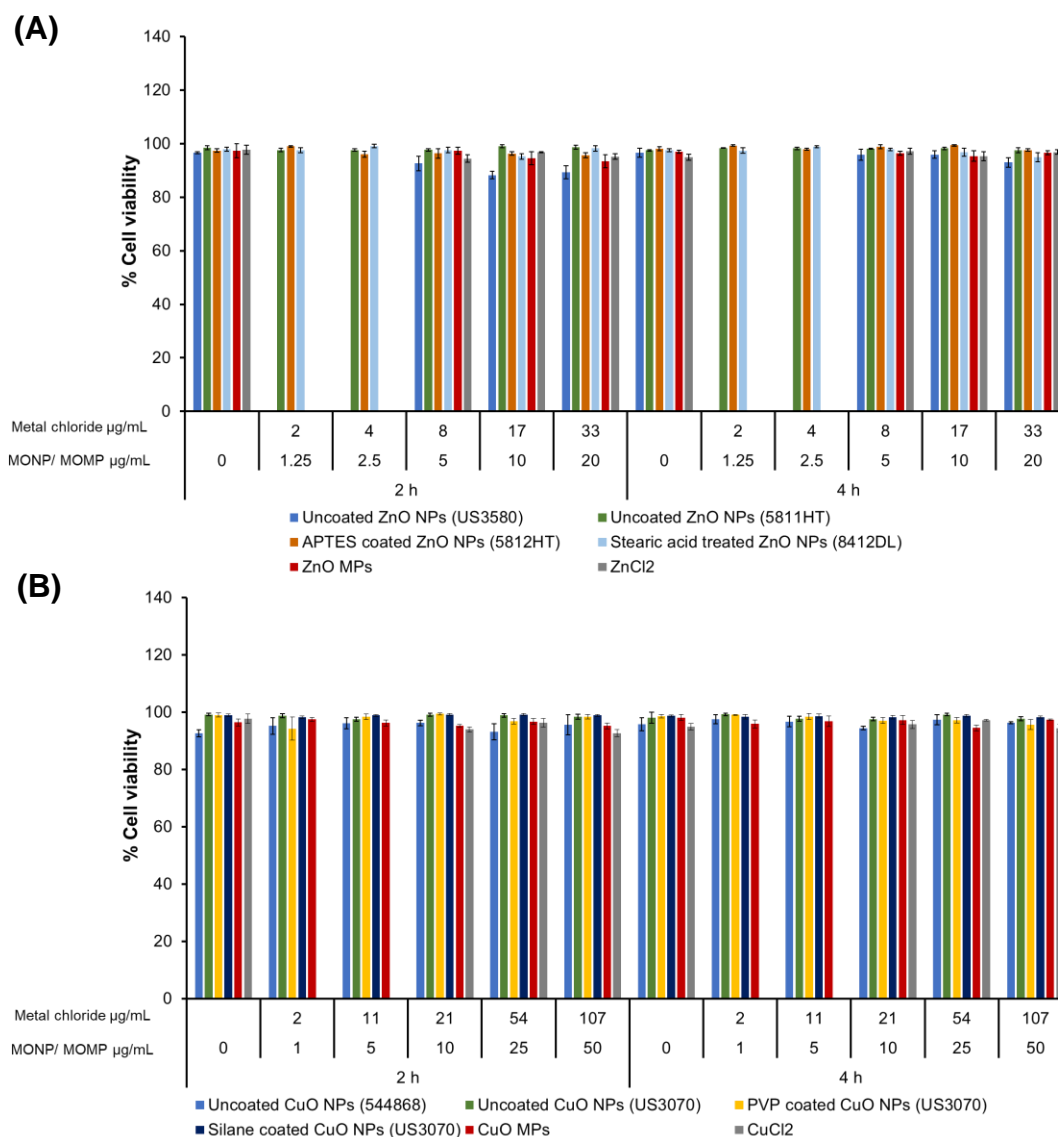

**Figure S9. Percentage of cell viability after exposure to (A) ZnO variants and ZnCl<sub>2</sub>, (B) CuO variants and CuCl<sub>2</sub>.** Trypan Blue exclusion method was conducted after 2 and 4 h of exposure. Data is presented as mean and standard error (n=3-4 independent experiments). Statistically significant differences between the exposed samples and the matched negative control were determined through Kruskal-Wallis test. Uncoated ZnO NPs (US3580), ZnO MPs, ZnCl<sub>2</sub>, uncoated CuO NPs (544868), CuO MPs, and CuCl<sub>2</sub> were previously published in Boyadzhiev et al. [34].

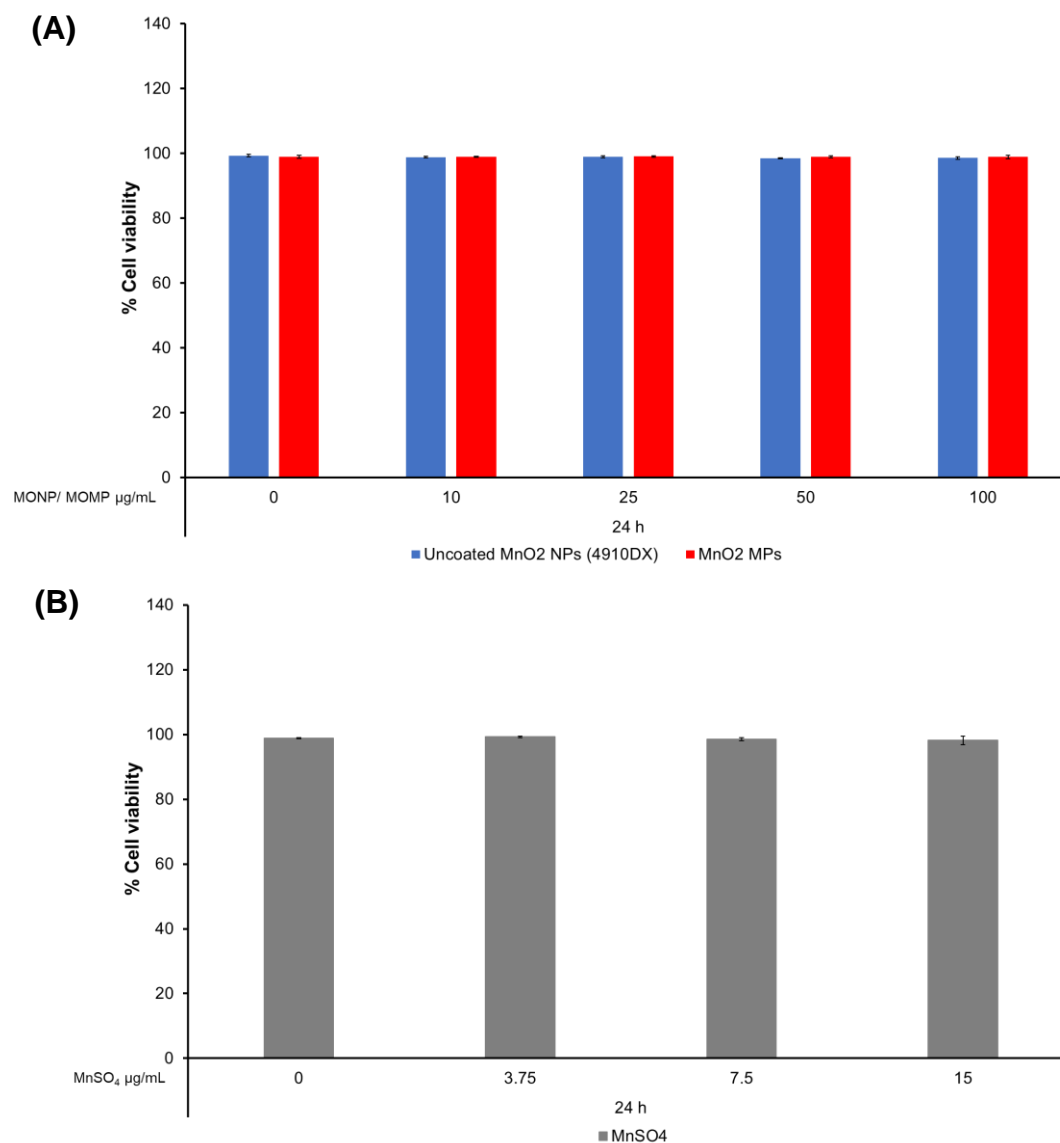

**Figure S10. Percentage of cell viability after exposure to (A) MnO<sub>2</sub> variants and (B) MnSO<sub>4</sub> for 24 h.** Trypan Blue exclusion method. Data is presented as mean and standard error (n=3-4 independent experiments). Statistically significant differences between the exposed samples and the matched negative control were determined through Kruskal-Wallis test.



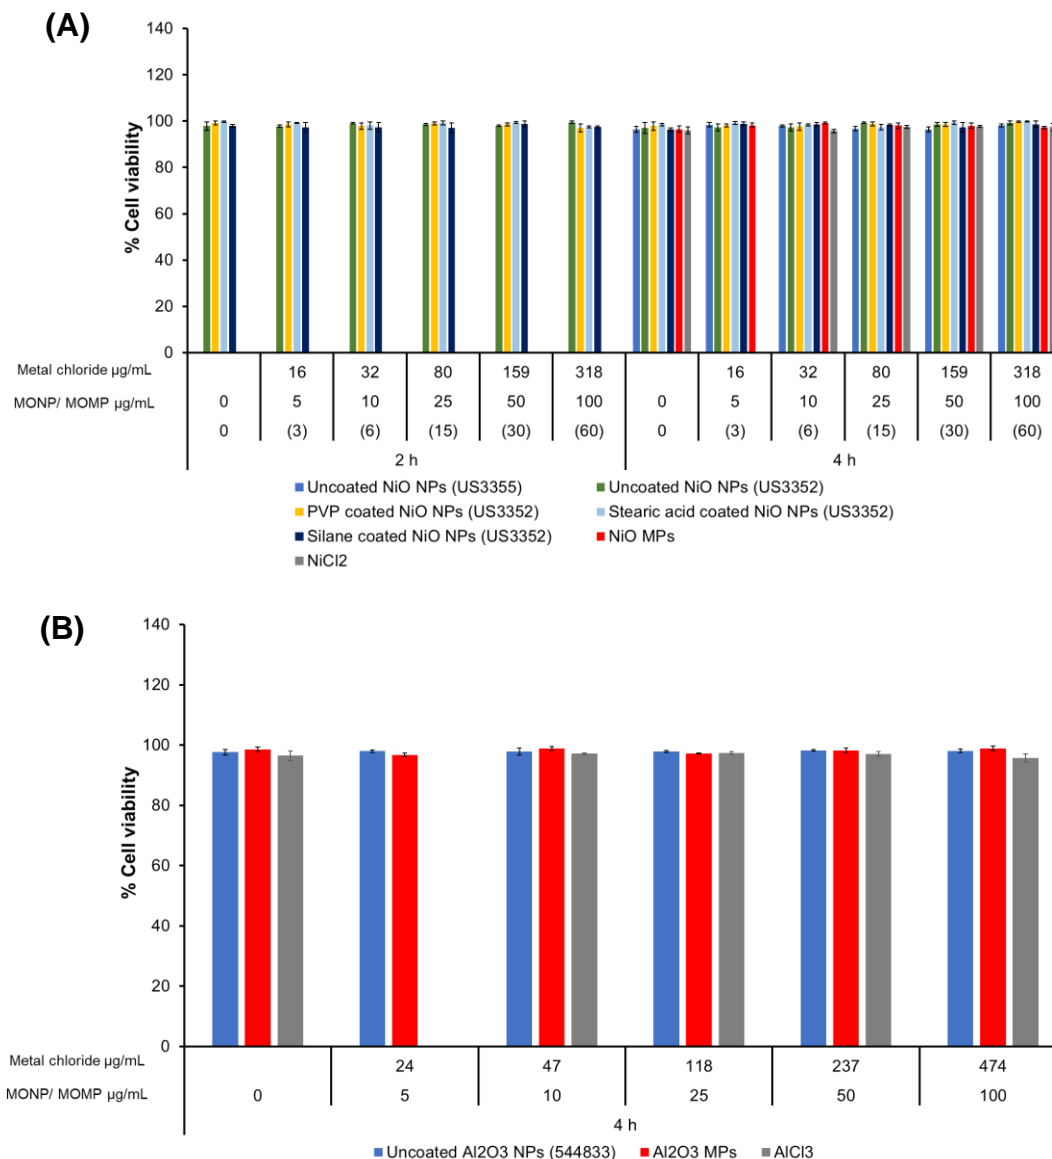

**Figure S11. Percentage of cell viability after exposure to (A) NiO variants and NiCl<sub>2</sub> for 2 and 4 h, (B) Al<sub>2</sub>O<sub>3</sub> variants and AlCl<sub>3</sub> for 4 h.** Trypan Blue exclusion method. (A) Data in parenthesis indicates the concentration of stearic acid coated NiO NPs. Data is presented as mean and standard error (n=3-4 independent experiments). Statistically significant differences between the exposed samples and the matched negative control were determined through Kruskal-Wallis test.

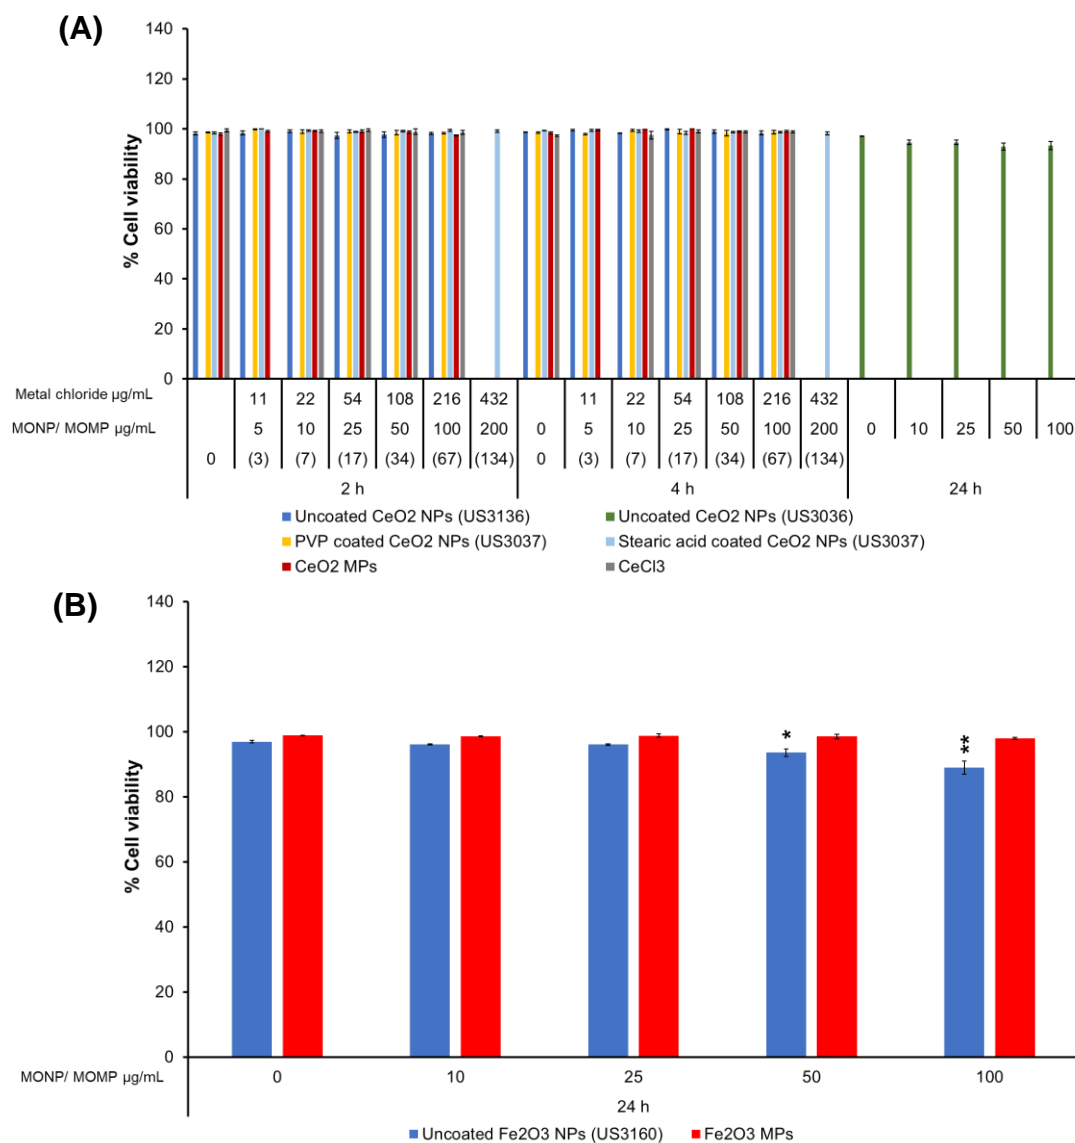

**Figure S12. Percentage of cell viability after exposure to (A) CeO<sub>2</sub> variants and CeCl<sub>3</sub>, (B) Fe<sub>2</sub>O<sub>3</sub> variants.** Uncoated CeO<sub>2</sub> NPs (US3036) and Fe<sub>2</sub>O<sub>3</sub> variants were only evaluated at 24 h. Uncoated CeO<sub>2</sub> (US3136), coated CeO<sub>2</sub> NPs and CeCl<sub>3</sub> were evaluated after 2 and 4 h of exposure. Trypan Blue exclusion method. (A) Data in parenthesis indicates the concentration of stearic acid coated CeO<sub>2</sub> NPs. Data is presented as mean and standard error (n=3-4 independent experiments). Statistically significant differences between the exposed samples and the matched negative control were determined through Kruskal-Wallis test with a Dunnett's post-hoc. \* *p* < 0.05, \*\* *p* < 0.01.

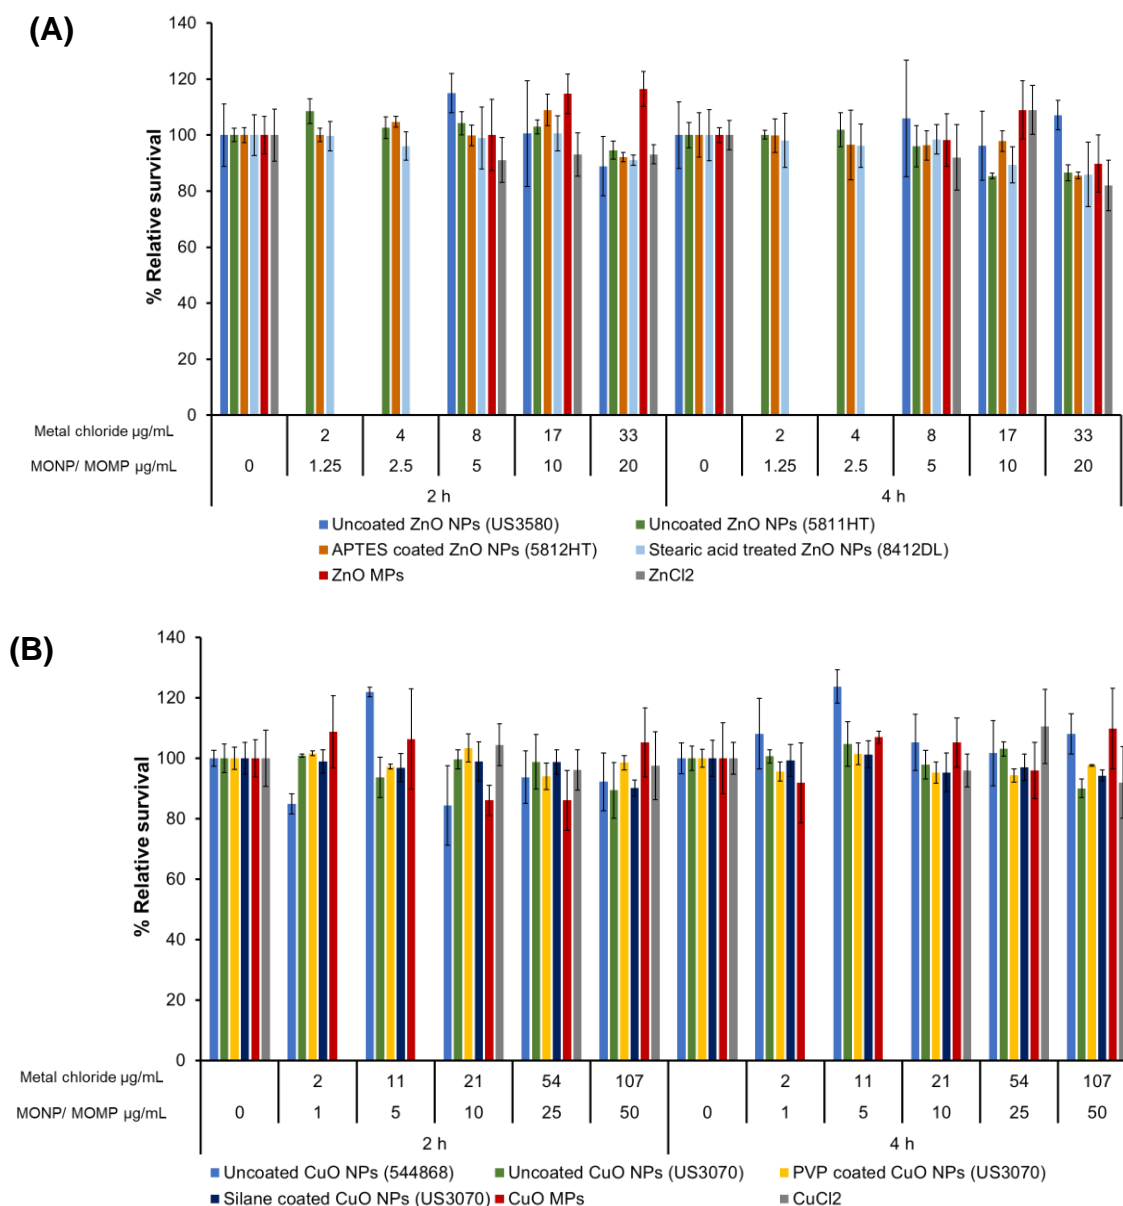

**Figure S13. Percentage of relative survival after exposure to (A) ZnO variants and ZnCl<sub>2</sub>, (B) CuO variants and CuCl<sub>2</sub>.** Trypan Blue exclusion method was conducted after 2 and 4 h of exposure. Data is presented as mean and standard error (n=3-4 independent experiments). Statistically significant differences between the exposed samples and the matched negative control were determined through Kruskal-Wallis test.

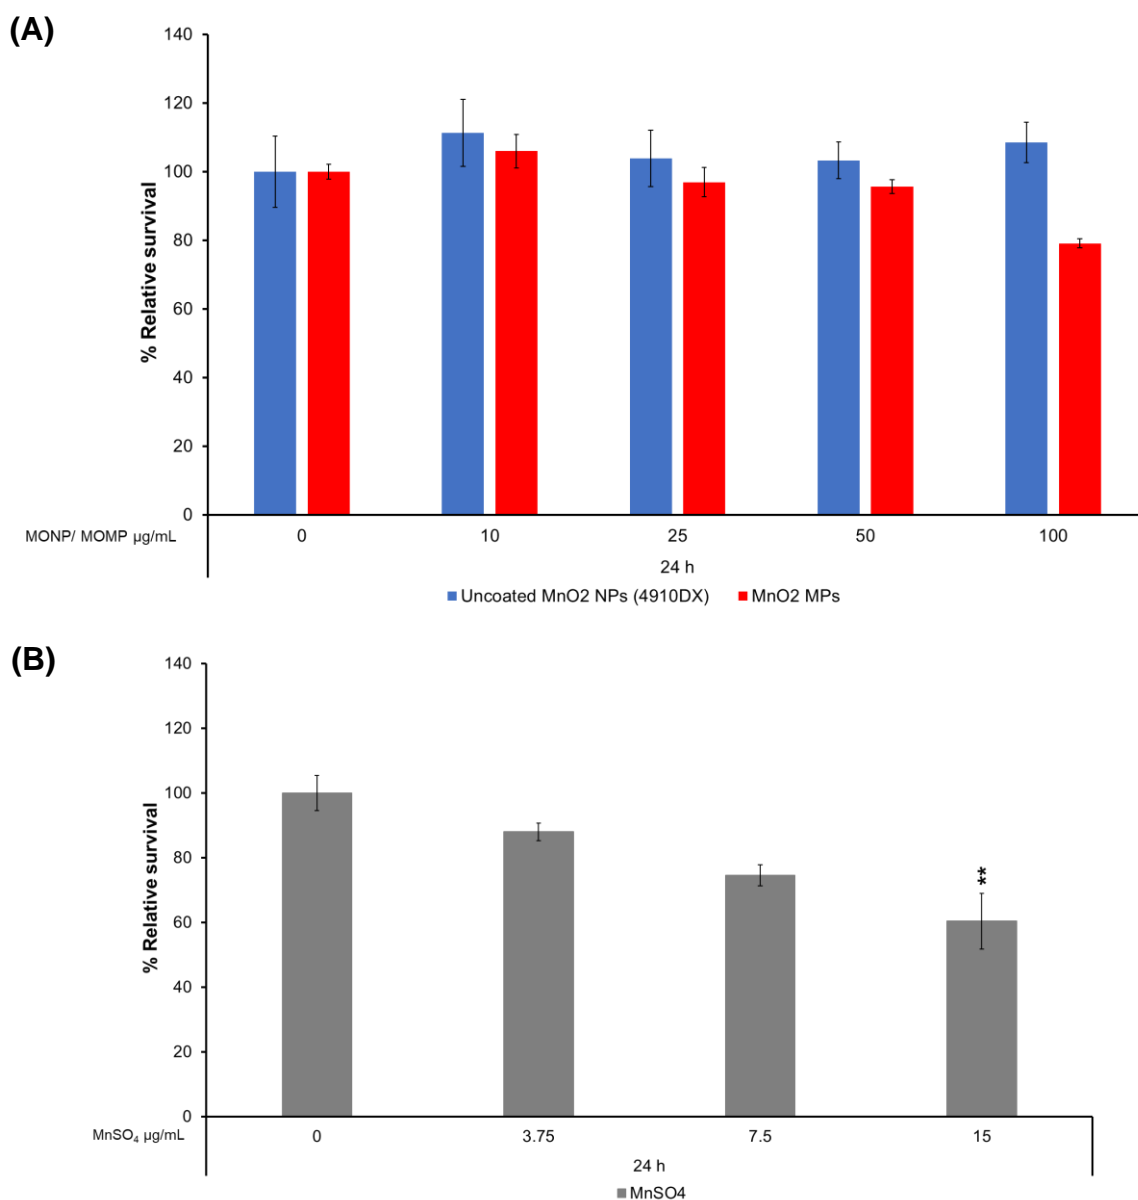

**Figure S14. Percentage of relative survival after exposure to (A) MnO<sub>2</sub> variants and MnSO<sub>4</sub> for 24 h.** Trypan Blue exclusion method. Data is presented as mean and standard error (n=3-4 independent experiments). Statistically significant differences between the exposed samples and the matched negative control were determined through Kruskal-Wallis test with a Dunnett's post-hoc. \*\*  $p < 0.01$ .

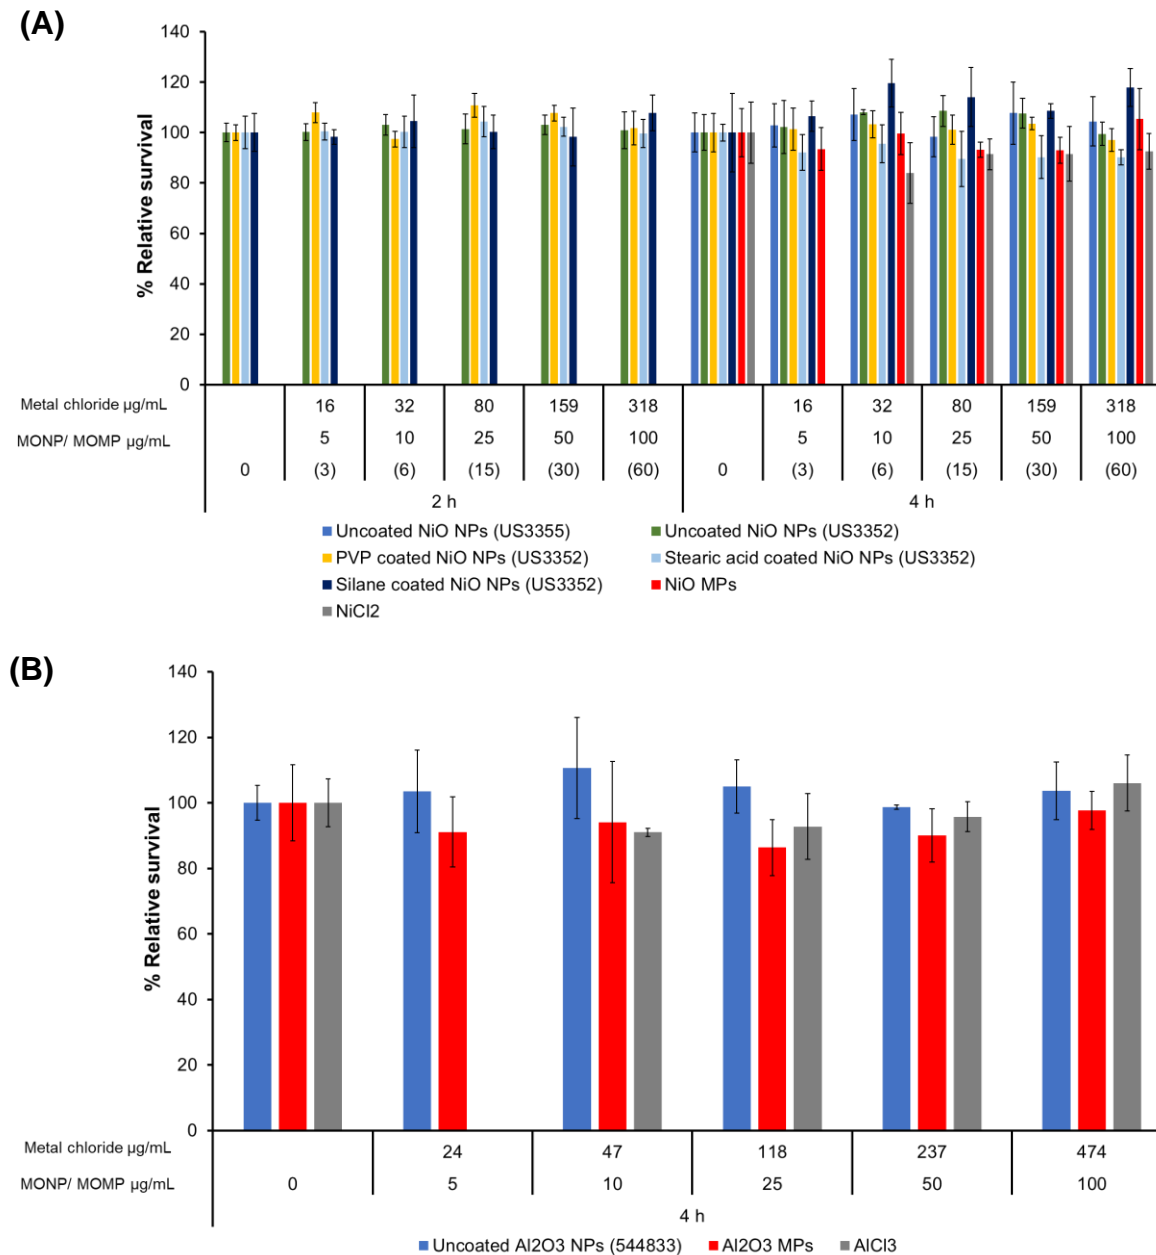

**Figure S15. Percentage of relative survival after exposure to (A) NiO variants and NiCl<sub>2</sub> for 2 and 4 h, (B) Al<sub>2</sub>O<sub>3</sub> variants and AlCl<sub>3</sub> for 4 h. Trypan Blue exclusion method. (A) Data in parenthesis indicates the concentration of stearic acid coated NiO NPs. Data is presented as mean and standard error (n=3-4 independent experiments). Statistically significant differences between the exposed samples and the matched negative control were determined through Kruskal-Wallis test.**

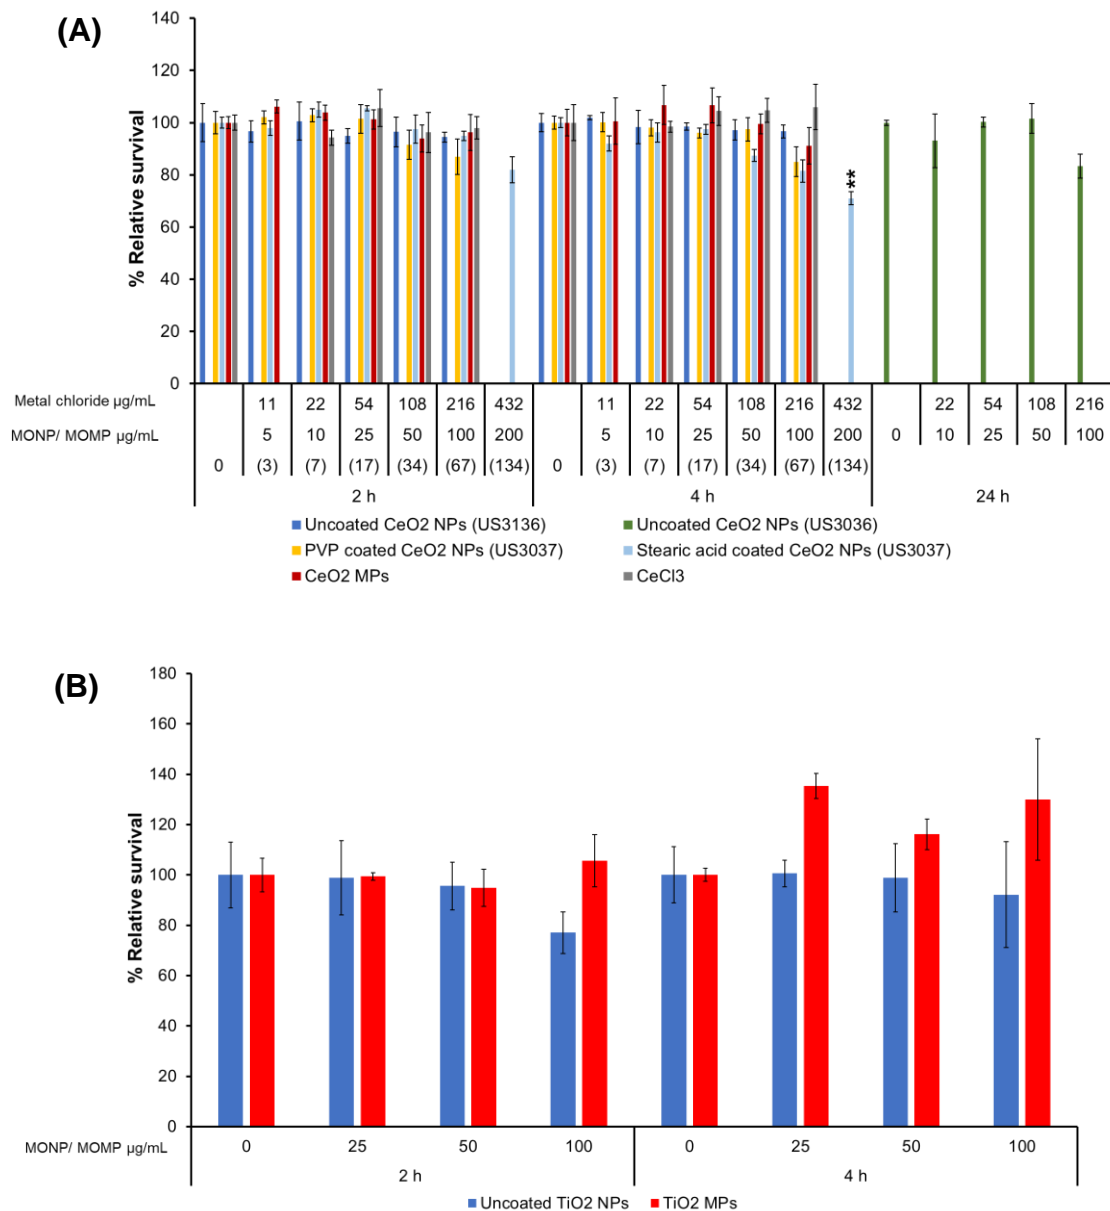

**Figure S16. Percentage of relative survival after exposure to (A) CeO<sub>2</sub> variants and CeCl<sub>3</sub> and (B) TiO<sub>2</sub> variants for 2 and 4 h.** Uncoated CeO<sub>2</sub> NPs (US3036) were only evaluated after 24 h of exposure. Trypan Blue exclusion method. (A) Data in parenthesis indicates the concentration of stearic acid coated CeO<sub>2</sub> NPs. Data is presented as mean and standard error (n=3-4 independent experiments). Statistically significant differences between the exposed samples and the matched negative control were determined through Kruskal-Wallis test with a Dunnett's post-hoc. \*\*  $p < 0.01$ .

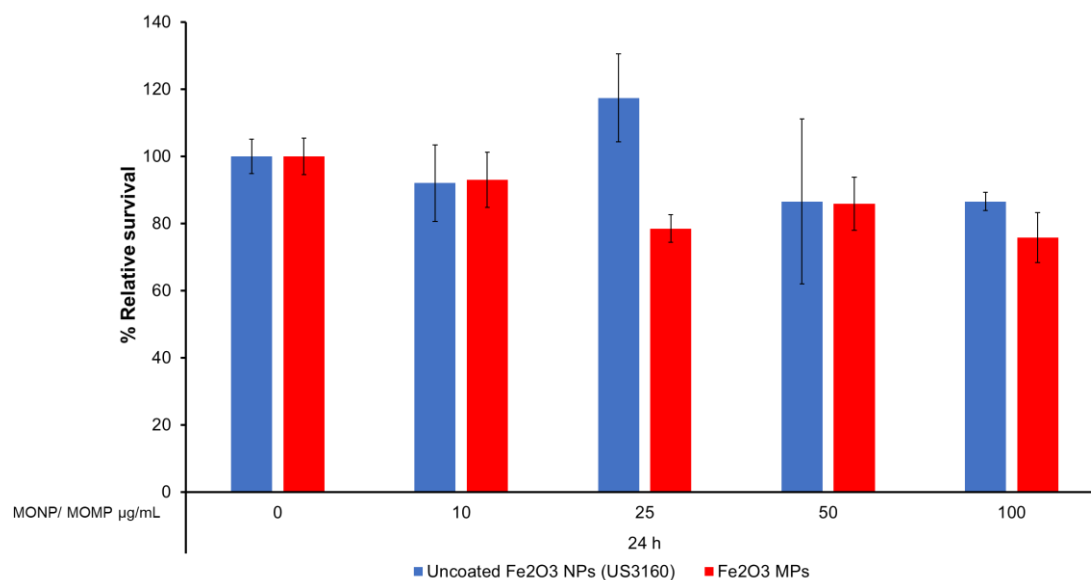

**Figure S17. Percentage of relative survival after exposure to (A) Fe<sub>2</sub>O<sub>3</sub> variants for 24 h.** Trypan Blue exclusion method. Data is presented as mean and standard error (n=3-4 independent experiments). Statistically significant differences between the exposed samples and the matched negative control were determined through Kruskal-Wallis test.

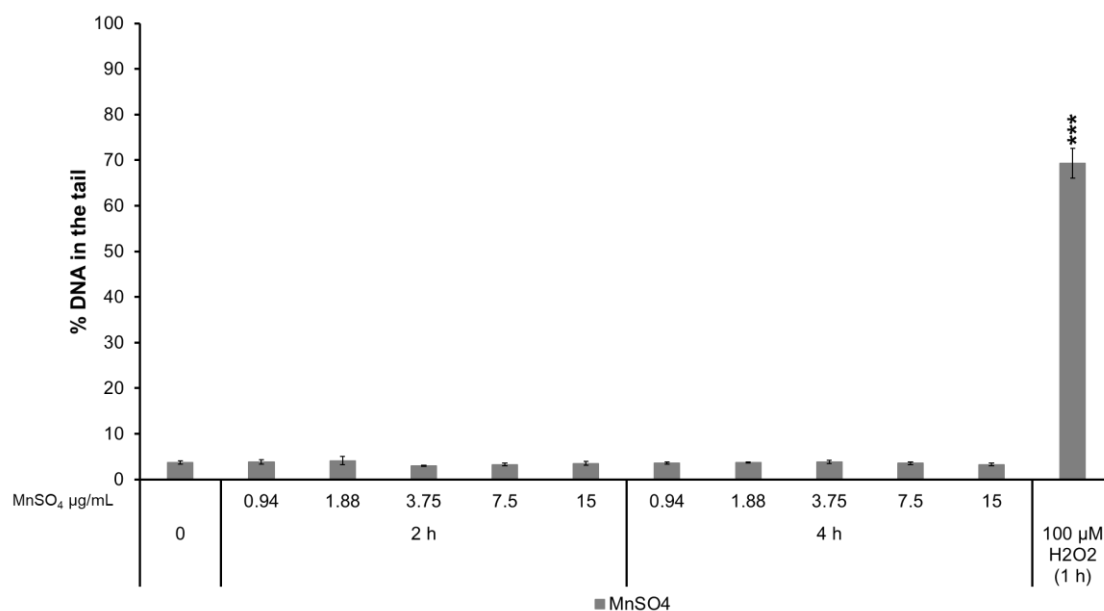

**Figure S18. Percentage of DNA in the tail in FE1 cells after exposure to MnSO<sub>4</sub> at 2 and 4 h.** Data is presented as mean and standard error (n=3-4). Statistically significant differences between the exposed samples and the matched negative control were determined through one-way ANOVA with a Dunnett's post-hoc. \*\*\*  $p < 0.001$ .



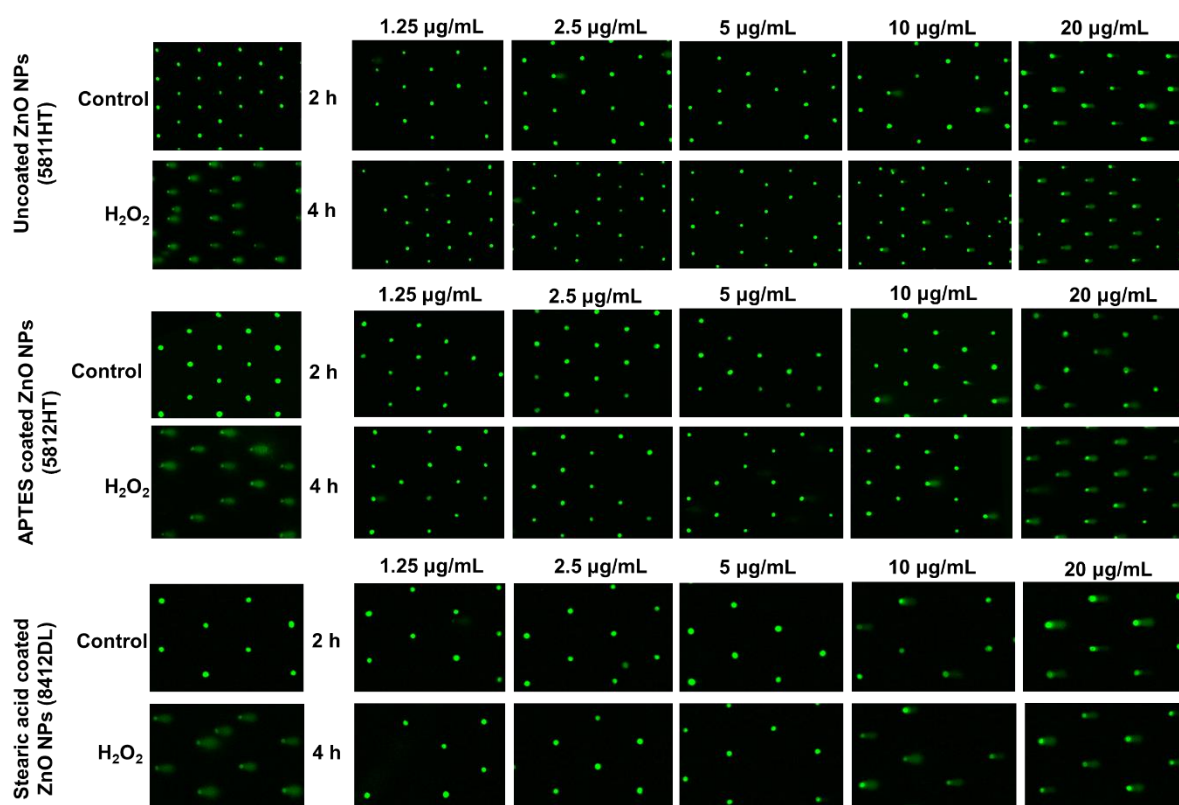

**Figure S19.** Representative images of comets after exposure to uncoated ZnO NPs (5811HT), APTES coated ZnO NPs (5812HT), and stearic acid coated ZnO NPs (8412DL). SYBR® Gold staining. Leica DMI8 automated confocal fluorescence microscope 5×.

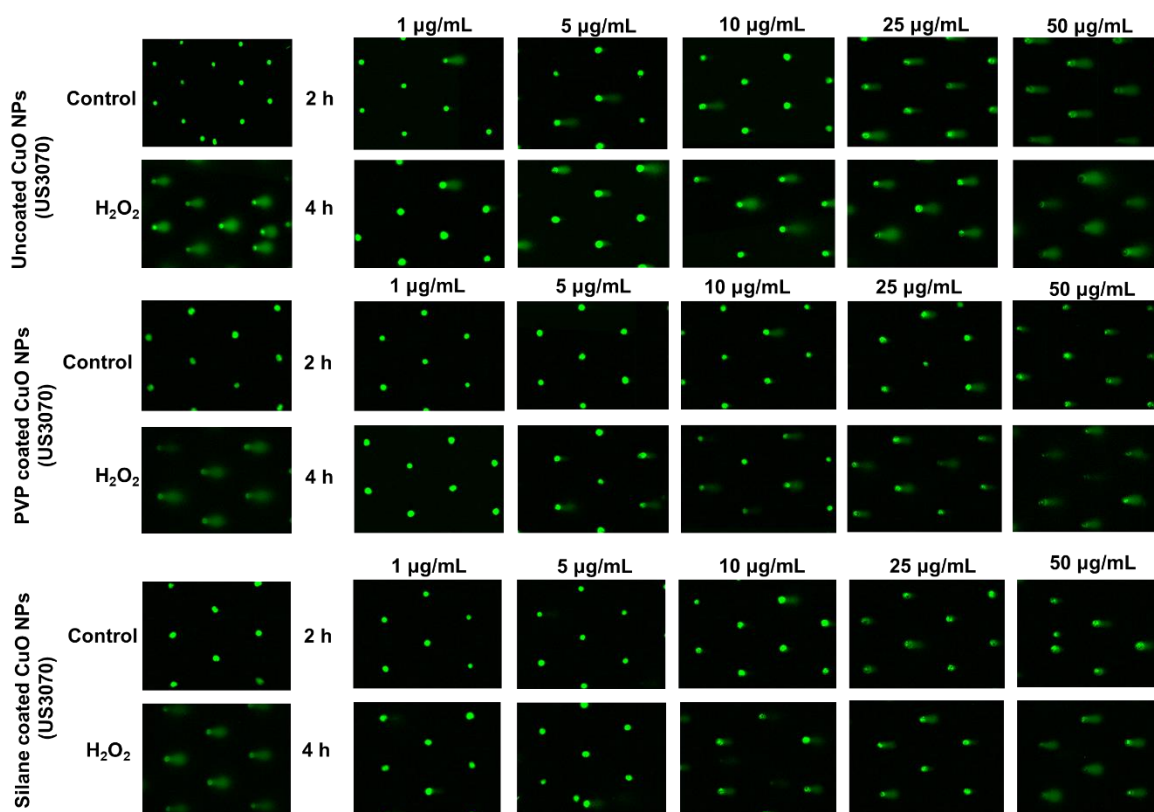

**Figure S20. Representative images of comets after exposure to uncoated CuO NPs (US3070), PVP coated CuO NPs (US3070), and silane coated CuO NPs (US3070). SYBR® Gold staining. Leica DMI8 automated confocal fluorescence microscope 5×.**

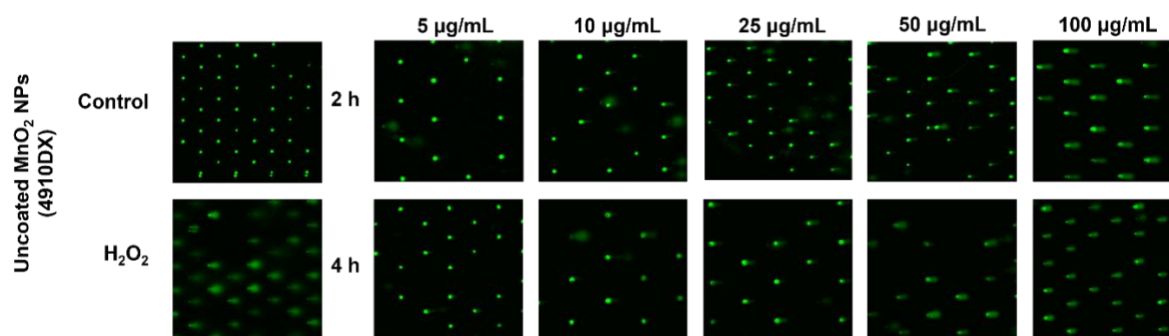

**Figure S21. Representative images of comets after exposure to uncoated  $\text{MnO}_2$  NPs (4910DX).** SYBR® Gold staining. Leica DMI8 automated confocal fluorescence microscope 5 $\times$ .

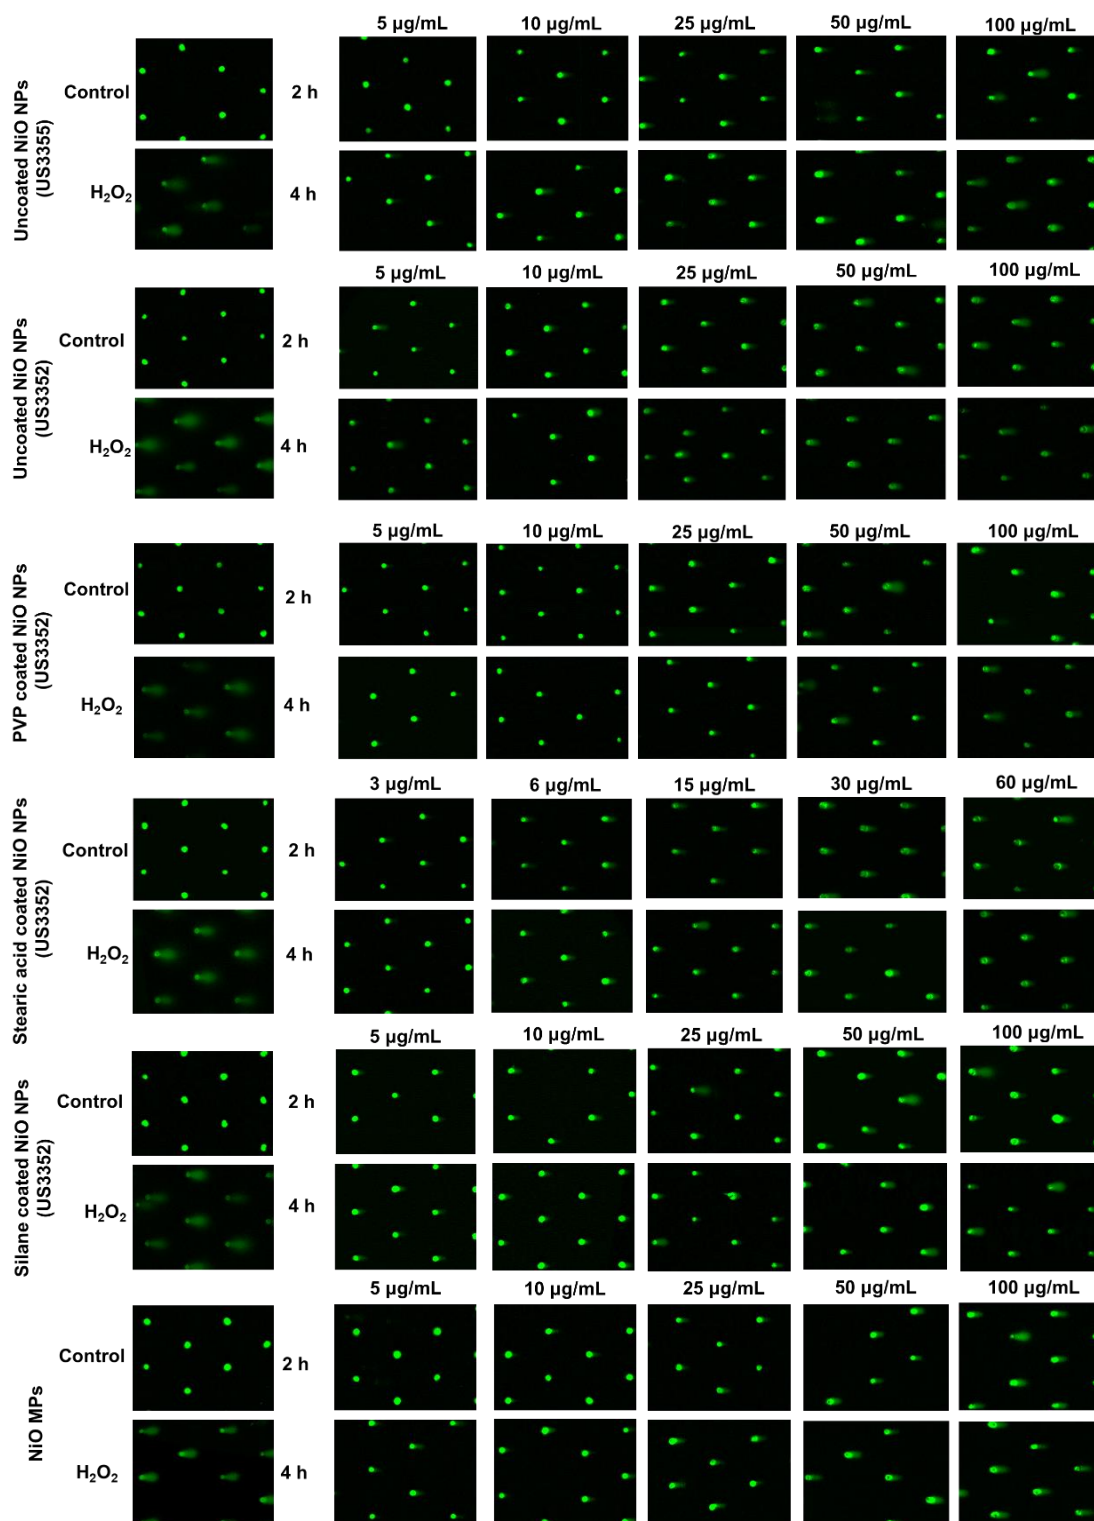

**Figure S22. Representative images of comets after exposure to NiO variants.** SYBR® Gold staining. Leica DMI8 automated confocal fluorescence microscope 5×.
