# Supplementary material for: A Systematic Genotoxicity Assessment of a Suite of Metal Oxide Nanoparticles Reveals Their DNA Damaging and Clastogenic Potential
Source: Nanomaterials (Basel). 2024 Apr 24;14(9):743. doi: 10.3390/nano14090743 (PMC11085103; doi:10.3390/nano14090743)
Supplement: Supplementary file 1 [file nanomaterials-14-00743-s001.zip › Supplementary File 1.xlsx]

## Sheet: All Properties_uM Normalized
File S1: Spearman's correlation analysis between the physicochemical properties of the MO and genotoxicity.
Cell Contents: Correlation Coefficient p Value Number of Samples
	% Solubility 10 µg/mL	% Solubility 100 µg/mL	Valence	Atomic Mass Metal Constituent	Size (nm)	SSA (m2/g)	Aggregate Size Media (HD) (nm)	PDI Media	Zeta Potential (mv)	% DNA in the tail / µM metal	MN fold-increase /µM metal
% Solubility 10 µg/mL		0.821 0.0145 7	-0.386 0.341 7	-0.107 0.781 7	0.0357 0.905 7	-0.607 0.121 7	-0.286 0.491 7	0.500 0.217 7	0.536 0.181 7	0.821 0.0145 7	0.750 0.0384 7
% Solubility 100 µg/mL			-0.483 0.0778 14	-0.0265 0.916 14	-0.104 0.715 14	-0.178 0.532 14	0 0.977 8	0.429 0.260 8	0.190 0.619 8	0.793 0.0000002 14	0.903 0.0000002 14
Valence				0.240 0.207 29	-0.109 0.571 29	0.252 0.186 29	0.278 0.219 21	-0.0620 0.784 21	-0.157 0.491 21	-0.689 0.0000339 29	-0.744 0.0000002 24
Atomic Mass Metal Constituent					-0.165 0.390 29	-0.0456 0.811 29	0.642 0.00166 21	0.244 0.281 21	0.241 0.289 21	0.130 0.498 29	0.0457 0.828 24
Size (nm)						-0.788 0.0000002 29	-0.142 0.535 21	-0.266 0.239 21	0.179 0.431 21	0.0119 0.950 29	0.112 0.597 24
SSA (m2/g)							-0.0649 0.776 21	-0.111 0.629 21	0.0500 0.824 21	-0.203 0.287 29	-0.370 0.0739 24
Aggregate Size Media (HD) (nm)								0.578 0.00617 21	0.0468 0.837 21	-0.123 0.589 21	-0.0235 0.926 16
PDI Media									0.273 0.228 21	0.116 0.609 21	0.357 0.171 16
Zeta Potential (mv)										0.480 0.0273 21	0.287 0.272 16
% DNA in the tail / µM metal											0.892 0.0000002 24
MN fold-increase /µM metal
SSA: Specific surface area experimentally determined by BET
HD: Hydrodynamic size
PDI: Polydispersity index
